# Supplementary figures and images for: Containment control of multiple unmanned surface vessels with NN control via reconfigurable hierarchical topology
Source: Frontiers journal article supplement (doi:10.3389/fncom.2023.1284966), 2023-10-19

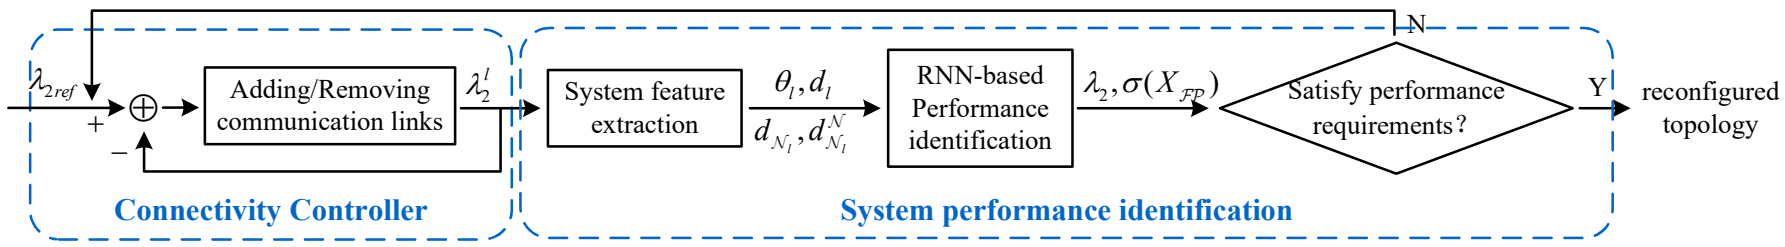

Supplement: Image_10.PDF [file Image_10.PDF]
